# Supplementary material
Source: publisher site journal article supplement (https://content.cld.iop.org/journals/1748-9326/14/11/114023/revision2/ERL_14_11_114023_suppdata.pdf)
Supplement: Supplementary file 1 [file ERL_14_11_114023_suppdata.pdf]

# A surface modelling approach for attribution and disentangling the effects of global warming from urbanization in temperature extremes: application to Lisbon

Miguel Nogueira and Pedro M. M. Soares

Instituto Dom Luiz, Faculdade de Ciências, Universidade de Lisboa. Campo Grande, 1749-016 Lisbon, Portugal

Corresponding author email: [mdnogueira@fc.ul.pt](mailto:mdnogueira@fc.ul.pt)

## Supplementary Material

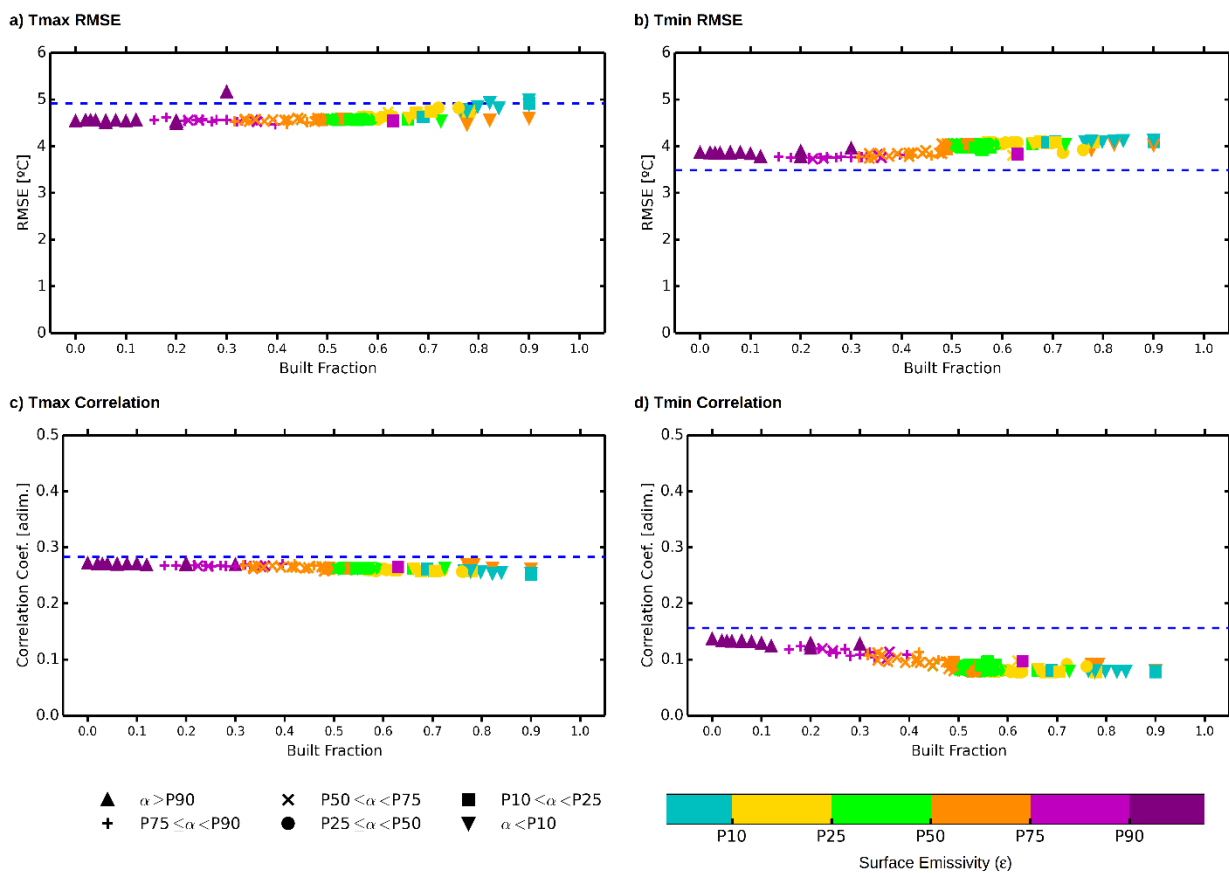

**Supplementary Figure 1.** Root-mean-squared error (RMSE) for a)  $T_{\max}$  and b)  $T_{\min}$ . Pearson correlation coefficient for c)  $T_{\max}$  and d)  $T_{\min}$ . All metrics were computed over the period 1981-2010 at daily time-scale using Lisbon station observations as reference. The blue dashed line represents E20C. Each of the markers represents one of the 125 SURFEX-TEB simulations. The marker colors represent the respective surface emissivity percentile (within the set of SURFEX-TEB simulation), while the marker type represents the surface albedo percentile. The high RMSE and low correlation coefficients found for both E20C and SURFEX-TEB simulations are due to the fact that the E20C dataset is only weakly constrained by observations, assimilating only surface pressure over land and marine winds, and thus a good day-to-day synchronization with the observations is not expected.
